# Supplementary material for: Cumulative Metabolic and Epigenetic Effects of Paternal and/or Maternal Supplementation with Arachidonic Acid across Three Consecutive Generations in Mice
Source: Cells. 2022 Mar 21;11(6):1057. doi: 10.3390/cells11061057 (PMC8947399; doi:10.3390/cells11061057)
Supplement: Supplementary file 1 [file cells-11-01057-s001.zip › cells-1601211 supp.xlsx]

## Sheet: Table 1
Online Supporting Material
Table S1. Fatty acid profile of the Laboratory Rodent diet 5001 and vehicle (Nutrioli® soy bean oil).
	% of total fatty acids
	Laboratory Rodent diet 5001		Nutrioli®
C14:0 (Myristic)	1.15		ND
C16:0 (Palmitic)	19.74		10.85
C18:0 (Stearic)	10.09		4.76
C20:0 (Arachidic)	0.31		ND
C16:1n-9 (cis-7-hexadecenoic)	0.09		ND
C16:1n-7 (Palmitoleic)	1.8		ND
C18:1c (Oleic)	28.09		20.92
C18:1t (Elaidic)	3.07		2.35
C20:1 (Eicosenoic)	0.77		ND
C18:2n-6 (Linoleic)	29.92		54.31
C20:4n-6 (Arachidonic)	0.18		ND
C:20:3n-6 (DGLA)	0.11		5.38
C18:3n-3 (alpha-linolenic)	2.32		ND
C20:5n-3 (EPA)	1.06		ND
C20:6n-3 (DHA)	0.99		ND
ND: not detected; DGLA: dihomo-gamma-linolenic acid; EPA: eicosapentaenoic acid; DHA: docosahexaenoic acid.

## Sheet: Table 2
Online Supporting Material
Table S2. FA supplementation across generations and offspring weight.
													ONE-MONTH-OLD OFFSPRING
FA SUPPLEMENTATION OF THREE-MONTH-OLD MICE																	mg FA exposure in offspring
								mg FA supplement					n				somatic				germline				somatic+germline				average body weight (g)
supplement		period		generation		n		AA	VH	total FA		generation	all	male	female		AA	VH	tFA		AA	VH	tFA		AA	VH	tFA		all	male	female
MAA		Nov-Dec 2014		F0		30		22	70	92		F1	43	26	17		22	70	92		0	0	0		22	70	92		9.8±2.2	10.0±2.5	9.5±1.7
		March 2015		F1		7		22	70	92		F2	35	20	15		22	70	92		22	70	92		44	140	184		18.0±2.0	18.3±1.8	17.7±2.1
		June-Aug. 2015		F2		9		22	70	92		F3	20	5	15		22	70	92		44	140	184		66	210	276		17.2±2.3	18.7±3.1	16.7±1.9
		Nov 2014-Aug 2015		F0-F2		46		66	210	276		F1-F3	98	51	47		66	210	276		66	210	276		132	420	552		14.3±4.5	14.1±4.8	14.4±4.2
PAA		Sept-Oct. 2014		F0		30		13.5	32.5	46		F1	61	21	40		0	0	0		13.5	32.5	46		13.5	32.5	46		11.9±3.8	12.0±3.9	10.3±3.6
		Jan-Feb. 2015		F1		7		13.5	32.5	46		F2	29	14	15		0	0	0		27	65	92		27	65	92		11.1±3.2	11.3±3.6	10.9±2.8
		June-Aug. 2015		F2		7		13.5	32.5	46		F3	16	5	11		0	0	0		40.5	97.5	138		40.5	97.5	138		15.8±4.3	17.0±3.7	15.3±4.6
		Sept 2014-Aug 2015		F0-F2		44		40.5	97.5	138		F1-F3	106	40	66		0	0	0		81	195	276		81	195	276		12.3±4.0	12.7±3.9	11.7±4.1
MVH		Nov-Dec. 2014		F0		30		0	92	92		F1	64	30	34		0	92	92		0	0	0		0	92	92		13.4±2.0	14.1±1.8	12.9±2.1
		March-2015		F1		8		0	92	92		F2	27	14	13		0	92	92		0	92	92		0	184	184		16.2±2.6	17.1±2.7	15.2±2.0
		June. 2015-June. 2015		F2		5		0	92	92		F3	18	10	8		0	92	92		0	184	184		0	276	276		12.5±3.9	12.1±4.0	13.1±4.0
		Nov 2014-Aug. 2015		F0-F2		43		0	276	276		F1-F3	109	54	55		0	276	276		0	276	276		0	552	552		14.0±2.8	14.5±3.0	13.5±2.5
PVH		Aug-Sept. 2014		F0		30		0	46	46		F1	66	25	41		0	0	0		0	46	46		0	46	46		12.2±2.7	12.8±2.7	12.7±2.5
		Jan-Feb. 2015		F1		9		0	46	46		F2	34	18	16		0	0	0		0	92	92		0	92	92		12.4±2.2	12.2±2.4	12.6±2.0
		June-July 2015		F2		9		0	46	46		F3	21	11	10		0	0	0		0	138	138		0	138	138		14.6±2.4	14.9±2.5	14.3±2.5
		Aug 2014-July 2015		F0-F2		48		0	138	138		F1-F3	121	54	67		0	0	0		0	276	276		0	276	276		12.7±2.7	13.0±2.7	12.2±2.6
AA:arachidonic acid dissolved in VH (=vehicle; soybean oil) to a total volume of 5 ul; MAA, MVH:maternal exposure to AA and VH supplement, respectively; PAA, PVH:paternal exposure to AA and VH supplement, respectively; tFA:total FA; weight data points represent mean values (± SD).

## Sheet: Table 3 
Online Supporting Material
Table S3. Reproductive parameters of FA supplemented and non supplemented three-month-old dams.
								reproductive parameters
supplement	generation			mg AA exposure		weight (g) supplemental day 1		# litters	pups/litter	male:female
MAA	F0			0		32.31±2.85		7	6.4±1.5	1.5
	F1			22		30.17±1.16		7	5.0±1.6	1.3
	F2			44		37.50±1.00		3	6.7±1.5	0.3
PAA dams	F0			0		30.66±1.81		13	4.7±1.5	1.9
	F1			0		32.98±1.69		5	5.8±1.6	0.9
	F2			0		30.93±3.51		3	5.3±1.5	0.5
MVH	F0			0		32.32±2.85		13	4.9±2.2	0.9
	F1			92		31.49±1.82		6	4.5±0.8	1.1
	F2			184		32.80±0.95		3	6.0±1.0	1.3
PVH dams	F0			0		30.33±2.40		17	3.9±1.8	1.6
	F1			0		33.42±1.23		6	5.7±0.8	1.1
	F2			0		33.63±2.06		4	5.3±2.5	1.1
Each data point represents mean value (± SD); MAA, MVH: maternal exposure to AA and VH supplement, respectively; PAA, PVH dams: non supplemented dams bred to sires supplemented with AA or VH, respectively; supplemental day 1: day 1 of pregnancy.

## Sheet: Table 4 
Online Supporting Material
Table S4. Offspring organ weight and correlation with mg of FA exposure.
A: Average organ weight of one-month-old offspring of AA and VH supplemented mice.																								B. Correlations between mg of FA exposure and organ weights across three supplemented generations.
				n				liver				brain				intestine				testes		uterus/ovary
supplement	period	generation		all	male	female		all	male	female		all	male	female		all	male	female		male		female		supplement	liver	brain	intestine	testis	uterus/ovary
MAA	Nov-Dec 2014	F1		10	5	5		0.54±0.12	0.54±0.14	0.54±0.11		0.37±0.02	0.37±0.02	0.38±0.01		1.70±0.30	1.71±0.36	1.69±0.26		0.06±0.01		0.02±0.01		PAA (germline)	0.498	-0.0118	0.410	0.4655	0.2403
	March 2015	F2		9	5	4		1.02±0.12	1.04±0.12	1.00±0.15		0.42±0.01	0.42±0.01	0.42±0.02		1.97±0.21	2.07±0.21	1.88±0.17		0.10±0.02		0.04±0.02		MAA (germline+somatic)	0.707*	0.599*	0.1946	0.751**	0.752**
	June-Aug. 2015	F3		11	5	6		0.96±0.14	1.02±0.17	0.92±0.10		0.42±0.03	0.41±0.02	0.42±0.03		1.84±0.26	1.79±0.37	1.87±0.15		0.11±0.02		0.06±0.02		PAA+MAA (germline)	0.540	0.1423	0.1834	0.601*	0.2712
	Nov 2014-Aug 2015	F1-F3		30	15	15																		PAA+MAA (germline+somatic)	0.652*	0.2962	0.422**	0.5245	0.1649
PAA	Sept-Oct. 2014	F1		10	5	5		0.59±0.22	0.57±0.24	0.60±0.23		0.36±0.03	0.37±0.03	0.36±0.03		1.40±0.32	1.33±0.28	1.47±0.37		0.07±0.03		0.05±0.04		PVH (germline)	0.578*	0.374	0.0556	0.0802	0.302
	Jan-Feb. 2015	F2		10	5	5		0.61±0.18	0.66±0.22	0.55±0.13		0.4±0.02	0.40±0.02	0.40±0.02		1.58±0.32	1.63±0.41	1.54±0.23		0.07±0.03		0.03±0.01		MVH (germline+somatic)	-0.155	-0.253	0.389*	-0.0486	0.0263
	June-Aug. 2015	F3		10	4	6		0.88±0.23	0.96±0.28	0.83±0.19		0.4±0.03	0.42±0.04	0.39±0.02		1.72±0.3	1.86±0.23	1.63±0.32		0.10±0.03		0.1±0.16		PVH+MVH (germline)	0.054	0.001	-0.275*	-0.011	0.069
	Sept 2014-Aug 2015	F1-F3		30	14	16																		PVH+MVH (germline+somatic)	0.179	0.135	-0.123	0.0285	0.144
MVH	Nov-Dec. 2014	F1		10	5	5		0.78±0.20	0.76±0.37	0.79±0.19		0.41±0.03	0.41±0.03	0.40±0.03		1.84±0.46	1.76±0.37	1.92±0.57		0.09±0.03		0.04±0.04		In bold, significant correlations (Pearson's test); *, p<0.05; **, p<0.01; ***, p<0.001; in italics, p<0.1. MAA, MVH:maternal exposure to AA and VH supplement, respectively; PAA, PVH: paternal exposure to AA and VH supplement, respectively.
	March-2015	F2		10	5	5		0.96±0.08	0.98±0.11	0.93±0.05		0.42±0.01	0.42±0.01	0.41±0.01		1.88±0.12	1.91±0.15	1.86±0.09		0.09±0.03		0.06±0.04
	June. 2015-June. 2015	F3		10	5	5		0.7±0.25	0.70±0.30	0.69±0.24		0.39±0.04	0.39±0.03	0.39±0.04		1.46±0.44	1.44±0.47	1.47±0.46		0.11±0.02		0.04±0.02
	Nov 2014-Aug. 2015	F1-F3		30	15	15
PVH	Aug-Sept. 2014	F1		10	5	5		0.63±0.12	0.68±0.13	0.59±0.11		0.38±0.03	0.38±0.03	0.37±0.03		1.54±0.26	1.61±0.24	1.48±0.29		0.09±0.02		0.04±0.01
	Jan-Feb. 2015	F2		10	5	5		0.66±0.1	0.65±0.10	0.68±0.11		0.38±0.04	0.36±0.05	0.39±0.02		1.74±0.23	1.68±0.25	1.8±0.22		0.08±0.02		0.03±0.01
	June-July 2015	F3		13	6	7		0.77±0.27	0.92±0.15	0.79±0.16		0.41±0.03	0.41±0.04	0.40±0.03		1.59±0.26	1.64±0.32	1.55±0.22		0.09±0.05		0.05±0.01
	Aug 2014-July 2015	F1-F3		33	16	17
AA:arachidonic acid dissolved in VH (=vehicle; soybean oil) to a total volume of 5 ul; MAA, MVH: maternal exposure to AA and VH supplement, respectively; PAA, PVH: paternal exposure to AA and VH supplement, respectively. weight data points represent mean values (± SD)

## Sheet: Table 5
Online Supporting Material
Table S5. Analysis of liver tissue of one-month old offspring of FA supplemented mice.
A. Liver weight and total fat content.
				# mice					liver weight (g)			total fat (%)
supplement		generation		all	male	female		all	male	female		all	male	female
MAA		F1		6	3	3		0.53±0.16	0.53±0.19	0.54±0.16		43.46±7.54	41.08±12.13	45.84±0.87
		F2		6	3	3		0.99±0.13	1.03±0.14	0.95±0.13		32.15±2.49	34.11±0.03	30.19±1.82
		F3		6	3	3		0.96±0.17	1.01±0.23	0.92±0.12		35.89±8.38	31.53±7.79	40.26±8.58
		F1-F3		18	9	9		0.83±0.26	0.86±0.29	0.80±0.23		37.17±6.16	35.57±4.94	38.76±7.93
PAA		F1		6	3	3		0.55±0.14	0.53±0.17	0.58±0.15		34.01±7.78	35.82±5.15	32.2±11.91
		F2		6	3	3		0.62±0.13	0.62±0.18	0.63±0.11		39.61±5.75	34.8±2.56	44.42±0.13
		F3		6	3	3		0.95±0.26	0.99±0.33	0.90±0.23		39.99±4.43	40.79±6.31	39.19±4.08
		F1-F3		18	9	9		0.71±0.25	0.71±0.30	0.70±0.21		37.87±4.45	37.14±3.21	38.60±6.13
MVH		F1		6	3	3		0.86±0.21	0.87±0.21	0.85±0.25		40.05±3.97	38.53±2.75	41.57±1.75
		F2		6	3	3		0.96±0.10	0.97±0.14	0.94±0.06		30.21±19.66	47.08±3.42	13.33±2.98
		F3		6	3	3		0.72±0.26	0.75±0.29	0.68±0.28		37.53±9.24	31.22±4.08	43.85±8.93
		F1-F3		18	9	9		0.84±0.21	0.87±0.22	0.82±0.22		35.93±12.32	38.94±7.94	32.92±17.0
PVH		F1		6	3	3		0.63±0.15	0.7±0.17	0.57±0.11		30.04±7.61	36.15±4.62	23.93±1.75
		F2		6	3	3		0.69±0.07	0.64±0.05	0.74±0.04		44.41±7.09	42.45±4.40	46.37±10.78
		F3		6	3	3		0.92±0.16	1.02±0.06	0.83±0.19		27.53±3.7	25.23±4.25	29.83±1.37
		F1-F3		18	9	9		0.77±0.15	0.79±0.19	0.76±0.11		33.99±9.22	34.61±8.71	33.38±11.63
Each data point represents the mean value (± SD) livers samples pooled from individual mouse livers.
B. Individual FA content of liver.
									% NORMALIZED SFA															% NORMALIZED MUFA																				% NORMALIZED PUFA
								C14:0 Myristic				C16:0 Palmitic				C18:0 Stearic				C20:0 Arachidic				C16:1n-7 Palmitoleic				C16:1n-9 HDA				cC18:1n-9 Oleic				tC18:1n-9 Elaidic				C20:1n-9 Eicosenoic				C18:2n-6 Linoleic				C20:4n-6 Arachidonic
supplement		generation		all	male	female		all	male	female		all	male	female		all	male	female		all	male	female		all	male	female		all	male	female		all	male	female		all	male	female		all	male	female		all	male	female		all	male
MAA		F1		6	3	3		0.39±0.03	0.38±0.04	0.40±0.02		34.18±0.68	34.39±0.21	33.93±1.06		28.44±0.42	28.68±0.03	28.17±0.49		0.19±0.06	0.15±0.01	0.23±0.06		0.78±0.2	0.63±0.01	0.93±0.17		0.05±0.06	0.10±0.01	ND		11.37±0.25	11.52±0.21	11.22±0.22		3.26±0.06	3.30±0.05	3.22±0.01		0.47±0.08	0.42±0.09	0.51±0.04		11±0.06	10.96±0.07	11.04±0.02		5.60±0.3	5.39±0.13
		F2		6	3	3		0.52±0.08	0.46±0.08	0.57±0.03		39.20±0.5	39.28±0.21	38.95±0.76		25.17±0.88	25.33±0.76	24.90±1.26		0.17±0.14	0.11±0.02	0.24±0.21		0.71±0.04	0.72±0.06	0.69±0.03		0.22±0.01	0.22±0.02	0.21±0.01		13.72±0.59	14.19±0.13	13.25±0.37		2.41±0.13	2.49±0.15	2.33±0.06		0.25±0.02	0.25±0.01	0.25±0.03		9.67±0.78	9.16±0.29	10.19±0.82		4.47±0.15	4.36±0.13
		F3		6	3	3		0.35±0.12	0.26±0.05	0.45±0.06		35.99±0.59	36.36±0.06	35.51±0.55		28.61±1.72	29.68±0.18	27.46±1.96		0.09±0.01	0.09±0.01	0.09±0.02		0.78±0.17	0.64±0.05	0.91±0.10		0.16±0.02	0.17±0.00	0.15±0.01		11.69±0.35	11.39±0.14	11.99±0.07		3.19±0.07	3.23±0.10	3.16±0.03		0.26±0.03	0.24±0.01	0.28±0.02		10.58±0.47	10.68±0.01	10.48±0.78		4.37±0.23	4.25±0.19
		F1-F3		18	9	9		0.42±0.07	0.36±0.05	0.47±0.03	#VALUE!	36.45±0.59	36.67±0.16	36.13±0.79	#VALUE!	27.40±1.00	27.89±0.32	26.84±1.23	#VALUE!	0.15±0.07	0.11±0.01	0.18±0.09	#VALUE!	0.75±0.13	0.66±0.04	0.84±0.10	#VALUE!	0.14±0.03	0.16±0.01	0.18±0.01	#VALUE!	12.26±0.39	12.36±0.16	12.15±0.22	#VALUE!	2.95±0.08	3.00±0.10	2.90±0.03	#VALUE!	0.32±0.04	0.3±0.03	0.34±0.03	#VALUE!	10.41±0.43	10.26±0.12	10.57±0.54	#VALUE!	4.81±0.22	4.66±0.15
PAA		F1		6	3	3		0.31±0.05	0.35±0.03	0.27±0.00		32.57±1.99	33.97±1.87	31.12±0.31		27.63±1.52	28.28±2.17	26.94±0.59		0.18±0.06	0.18±0.09	0.18±0.06		0.6±0.08	0.55±0.02	0.65±0.10		0.09±0.06	0.11±0.01	0.06±0.08		11.13±0.61	11.58±0.52	10.68±0.15		3±0.07	2.96±0.07	3.03±0.08		0.7±0.48	0.95±0.65	0.45±0.04		12.16±0.42	11.84±0.14	12.47±0.33		5.73±2.34	4.32±2.88
		F2		6	3	3		0.33±0.17	0.40±0.26	0.26±0.01		34.95±1.43	36.12±0.53	33.74±0.15		27.8±0.36	27.46±0.11	28.11±0.01		0.11±0.01	0.11±0.02	0.11±0.00		0.51±0.07	0.46±0.01	0.57±0.05		0.06±0.07	0.12±0.00	ND		10.66±0.16	10.80±0.02	10.52±0.03		2.31±0.08	2.37±0.05	2.26±0.07		0.29±0.05	0.31±0.09	0.28±0.02		11.72±0.33	11.44±0.10	11.99±0.08		6.24±0.43	5.88±0.03
		F3		6	3	3		0.27±0.04	0.29±0.06	0.25±0.01		34.89±0.82	34.61±1.18	35.05±0.63		26.34±1.18	25.28±0.27	27.31±0.31		0.07±0.05	0.06±0.08	0.08±0.00		0.31±0.35	ND	0.61±0.01		0.17±0.04	0.21±0.03	0.14±0.00		12.07±0.83	12.77±0.07	11.37±0.29		2.84±0.1	2.90±0.14	2.79±0.01		0.26±0.05	0.30±0.02	0.22±0.01		11.84±0.47	12.22±0.18	11.47±0.25		5.58±0.21	5.75±0.14
		F1-F3		18	9	9		0.30±0.08	0.34±0.11	0.26±0.00	#VALUE!	34.13±1.41	34.90±1.19	33.30±0.36	#VALUE!	27.25±1.02	27.00±0.85	27.45±0.30	#VALUE!	0.12±0.04	0.11±0.06	0.12±0.02	#VALUE!	0.47±0.16	0.50±0.01	0.61±0.05	#VALUE!	0.10±0.05	0.14±0.01	0.1±0.04	#VALUE!	11.28±0.53	11.71±0.20	10.85±0.15	#VALUE!	2.71±0.08	2.74±0.08	2.69±0.05	#VALUE!	0.41±0.19	0.52±0.25	0.31±0.02	#VALUE!	11.90±0.40	11.83±0.14	11.97±0.22	#VALUE!	5.85±0.99	5.31±1.01
MVH		F1		6	3	3		0.47±0.07	0.41±0.01	0.52±0.04		34.55±1.83	36.06±0.45	32.93±0.07		27.44±2.18	29.02±1.84	25.77±0.55		0.16±0.05	0.20±0.06	0.13±0.01		0.78±0.07	0.72±0.05	0.83±0.00		0.18±0.02	0.18±0.03	0.17±0.01		14.02±0.34	14.27±0.23	13.77±0.20		3.39±0.07	3.37±0.10	3.42±0.05		0.63±0.42	0.81±0.64	0.45±0.03		9.77±1.56	8.52±0.88	11.02±0.46		3.97±1.92	2.57±1.76
		F2		6	3	3		0.38±0.1	0.32±0.01	0.43±0.13		35.23±2.61	37.31±0.56	33.03±1.28		23.68±1.46	24.41±0.31	22.87±1.98		0.09±0.02	0.08±0.01	0.10±0.03		0.63±0.09	0.61±0.02	0.65±0.14		0.17±0.02	0.18±0.01	0.15±0.03		12.72±0.65	13.28±0.06	12.17±0.15		2.34±0.07	2.33±0.02	2.35±0.13		0.27±0.08	0.19±0.00	0.34±0.03		12.72±1.26	11.67±0.14	13.77±0.58		5.8±1.29	4.69±0.09
		F3		6	3	3		0.27±0.03	0.27±0.04	0.26±0.04		34.14±0.09	34.02±0.02	34.15±0.13		27.49±0.89	27.27±0.27	27.62±1.48		0.13±0.01	0.14±0.00	0.12±0.00		0.63±0.11	0.71±0.09	0.56±0.06		0.14±0.05	0.18±0.02	0.11±0.01		12.43±1.36	13.58±0.47	11.27±0.17		2.74±0.17	2.85±0.02	2.62±0.20		0.4±0.03	0.41±0.05	0.39±0.03		10.63±0.44	10.40±0.09	10.87±0.59		5.43±0.49	5.13±0.26
		F1-F3		18	9	9		0.37±0.06	0.33±0.02	0.40±0.07	#VALUE!	34.64±1.51	35.79±0.34	33.37±0.49	#VALUE!	26.20±1.51	26.90±0.80	25.42±1.33	#VALUE!	0.12±0.02	0.14±0.02	0.11±0.01	#VALUE!	0.68±0.09	0.68±0.05	0.68±0.06	#VALUE!	0.16±0.03	0.18±0.02	0.14±0.01	#VALUE!	13.05±0.78	13.71±0.25	12.40±0.17	#VALUE!	2.82±0.10	2.85±0.04	2.79±0.12	#VALUE!	0.43±0.17	0.47±0.23	0.39±0.03	#VALUE!	11.04±1.08	10.19±0.37	11.88±0.54	#VALUE!	5.06±1.23	4.13±0.70
PVH		F1		6	3	3		0.75±0.4	0.51±0.00	0.98±0.50		34.93±0.42	35.14±0.45	34.64±0.26		26.88±0.7	26.57±0.22	27.11±1.07		0.24±0.21	0.16±0.01	0.33±0.31		0.73±0.12	0.66±0.02	0.80±0.15		0.13±0.03	0.15±0.01	0.11±0.04		12.46±0.29	12.52±0.14	12.39±0.46		3.12±0.13	3.09±0.03	3.16±0.21		0.68±0.52	0.40±0.04	0.95±0.72		11.1±0.54	10.67±0.18	11.54±0.31		4.85±1.41	5.16±0.21
		F2		6	3	3		0.26±0.21	0.11±0.16	0.40±0.14		38.26±1.66	38.35±2.04	38.14±2.01		26.52±1.52	27.30±0.79	25.72±1.97		0.02±0.05	0.05±0.07	ND		0.56±0.10	0.49±0.09	0.62±0.07		0.05±0.06	0.05±0.07	0.06±0.08		10.48±0.54	10.42±0.16	10.54±0.91		2.51±0.23	2.50±0.30	2.51±0.26		0.18±0.01	0.18±0.01	0.18±0.02		11.67±0.81	11.10±0.10	12.25±0.79		5.43±0.45	5.48±0.35
		F3		6	3	3		0.53±0.08	0.52±0.10	0.54±0.10		34.88±1.24	35.83±0.48	33.86±0.60		27.29±0.34	27.53±0.09	26.98±0.04		0.16±0.01	0.16±0.02	0.15±0.01		0.68±0.09	0.66±0.01	0.71±0.15		0.12±0.08	0.18±0.01	0.06±0.08		12.54±0.49	12.93±0.07	12.16±0.36		2.59±0.14	2.50±0.03	2.69±0.13		0.38±0.06	0.34±0.01	0.41±0.08		10.59±0.44	10.21±0.01	10.97±0.06		5.02±0.47	4.62±0.00
		F1-F3		18	9	9		0.51±0.23	0.38±0.08	0.64±0.24	#VALUE!	36.02±1.10	36.44±0.99	35.54±0.95	#VALUE!	26.89±0.85	27.13±0.36	26.60±1.02	#VALUE!	0.14±0.09	0.12±0.03	0.24±0.16	#VALUE!	0.65±0.10	0.60±0.04	0.71±0.12	#VALUE!	0.10±0.05	0.12±0.03	0.07±0.06	#VALUE!	11.82±0.44	11.95±0.12	11.69±0.57	#VALUE!	2.74±0.16	2.69±0.12	2.78±0.20	#VALUE!	0.41±0.19	0.30±0.02	0.51±0.27	#VALUE!	11.12±0.59	10.66±0.09	11.58±0.38	#VALUE!	5.1±0.77	5.08±0.18
Each data point represents the mean value (± SD) livers samples pooled from individual mouse livers; ND:not detected
[truncated: 21 more columns]

## Sheet: Table 6
Online Supporting Material
Table S6. Correlations between liver weight, total fat and FA (individual and by degree of saturation) across three offspring generations.
		% FA by degree of saturation/position of double bond							% SFA					% MUFA						% PUFA
	total fat content	SFA	MUFA	PUFA	n-3	n-6	n-9		C14:0	C16:0	C18:0	C20:0		C16:1n-7	C16:1n-9	cC18:1n-9	tC18:1n-9	C20:1n-9		C20:3n-9	C18:2n-6	C20:4n-6	C20:3n-6	C20:5n-3	C22:6n-3
									Myristic	Palmitic	Stearic	Arachidic		Palmitoleic	HDA	Oleic	Elaidic	Eicosenoic		MEAD	Linoleic	Arachidonic	DGLA	EPA	DHA
PAA	0.458568	-0.133938	0.359721	-0.00921031	0.19206	-0.0548113	0.411484		-0.396574	0.363281	-0.759	-0.896		-0.657942	0.708139	0.713014	0.153604	-0.578995		-0.546539	-0.0584181	-0.0741187	0.0487545	0.689482	0.184239
MAA	-0.819*	0.763476	0.531986	-0.829*	0.137624	-0.903*	0.404631		0.178744	0.808963	-0.425975	-0.461303		-0.208046	0.869*	0.620329	-0.579179	-0.956**		-0.887*	-0.716	-0.964**	-0.153155	0.489366	-0.0426517
PAA+MAA	-0.348656	0.375977	0.506753	-0.467696	-0.0978539	-0.528716	0.475796		0.169903	0.579*	-0.0763423	-0.498		0.134773	0.605*	0.407598	0.0647818	-0.637*		-0.544044	-0.549324	-0.592*	-0.344612	0.781**	-0.317467
PVH	-0.279747	-0.114569	0.118461	0.030238	0.444185	-0.470723	0.115361		-0.156087	-0.141849	0.237109	-0.180779		-0.0387545	0.450325	0.415068	-0.549288	-0.390823		-0.135542	-0.568221	-0.154185	0.167291	-0.252807	0.542265
MVH	-0.510691	-0.686649	-0.137671	0.578496	0.588032	0.58967	-0.236395		0.0405165	-0.327974	-0.68232	-0.560646		0.166365	0.385229	0.0488161	-0.398185	-0.625847		-0.6586	0.637529	0.590634	-0.0284002	0.608347	0.593842
PVH+MVH	-0.350839	-0.498238	0.109784	0.388673	0.550669	0.280263	0.06853		-0.518	-0.289341	-0.105329	-0.234898		-0.297623	0.222775	0.05113	-0.440016	-0.312098		-0.148399	0.0825588	0.316142	0.192074	0.114185	0.604*
Correlations were performed on percent normallized FA by degree of saturation; in bold, significant correlations as determined by Pearson's test; *p<0.05; **p<0.01; ***p<0.001; in italics, p<0.1; LW:liver weight; HDA: cis-hexadecenoic acid; MEAD: eicosatrienoic acid; DGLA: dihomo-gamma-linolenic acid; EPA: eicosapentaenoic acid; DHA: docosahexaenoic acid.

## Sheet: Table 7
Online Supporting Material
Table S7: Global DNAm and Scd1, Ppargc1a promoter methylation of liver from one-month-old offspring of FA supplemented mice																																															some are the same values
								% promoter DNAm
				n				Scd1				Ppargc1a				% global DNAm
supplement		generation		all	male	female		all	male	female		all	male	female		all	male	female
MAA		F1		6	3	3		10.88 ± 7.7	5.44±0.28	16.32±1.73		19.78±4.06	16.91±0.86	22.65±1.19		1.19±0.46	0.90±0.12	1.11±0.36
		F2		6	3	3		4.17 ± 2.3	2.52±0.27	5.82±0.14		16.45±2.84	14.44±1.77	18.46±0.93		1.88±0.73	1.33±0.23	2.42±0.08
		F3		6	3	3		2.54 ± 0.5	2.18±1.73	2.89±0.87		16.31±3.92	13.54±1.15	19.08±1.09		1.67±0.34	1.96±0.13	1.39±0.07
		F1-F3		18	9	9		5.86±3.5	3.38±0.76	8.34±0.91		17.51±3.6	14.96±1.26	20.06±1.07		1.58±0.51	1.39±0.16	1.64±0.17
PAA		F1		6	3	3		4.25 ± 1.3	5.16±0.26	3.34±1.73		14.59±3.17	16.83±1.22	12.35±1.21		0.96±0.19	1.12±0.08	0.8±0.04
		F2		6	3	3		4.51 ± 1.5	5.54±0.67	3.48±1.73		14.74±3.51	12.25±1.51	17.22±1.17		1.08±0.21	0.97±0.20	1.25±0.07
		F3		6	3	3		3.03 ± 1.4	2.04±1.00	4.02±0.41		16.15±2.10	17.63±1.28	14.66±1.41		1.68±0.63	2.22±0.07	1.14±0.10
		F1-F3		18	9	9		3.93±1.4	4.24±0.64	3.61±1.29		15.16±2.92	15.57±1.33	14.74±1.26		1.24±0.34	1.43±0.11	1.06±0.07
MVH		F1		6	3	3		2.86 ± 1.2	1.99±1.73	3.72±1.22		15.17±1.83	13.87±1.17	16.46±1.09		1.77±0.13	1.81±0.21	1.73±0.04
		F2		6	3	3		6.66 ± 8.0	1.01±1.73	12.31±0.66		18.22±1.19	17.38±1.41	19.06±1.15		1.21±0.17	1.22±0.03	1.20±0.29
		F3		6	3	3		4.58 ± 1.0	3.89±0.54	5.26±0.40		16.4±0.24	16.57±1.27	16.23±1.21		1.12±0.62	0.65±0.02	1.58±0.55
		F1-F3		18	9	9		4.70±3.4	2.29±1.33	7.09±0.76		16.59±1.08	15.94±1.28	17.25±1.15		1.36±0.30	1.22±0.08	1.5±0.29
PVH		F1		6	3	3		4.53 ± 2.7	6.42±0.35	2.64±0.43		16.29±5.59	20.24±1.27	12.33±1.40		1.06±0.14	1.13±0.11	0.98±0.15
		F2		6	3	3		6.43 ± 3.2	4.2±0.37	8.66±0.33		15.99±0.19	15.86±1.39	16.13±1.27		2.54±0.96	2.63±0.71	1.89±0.39
		F3		6	3	3		3.84 ± 0.5	3.5±0.06	4.18±0.37		13.83±1.53	12.75±1.53	14.92±1.15		2.2±1.10	2.96±0.43	1.05±0.06
		F1-F3		18	9	9		4.93±2.1	4.71±0.26	5.16±0.37		15.37±2.43	16.28±1.39	14.46±1.27		1.93±0.73	2.24±0.41	1.30±0.20
Each data point represents the mean % of DNAm (± SD) of CpG sites evaluated in each region of samples pooled from individual mouse livers.
